# Supplementary material for: Using machine learning to analyze mental health in distance education during the COVID-19 pandemic: an opinion study from university students in Mexico
Source: PeerJ journal article supplement (doi:10.7717/peerj-cs.2241), 2024-08-08
Supplement: questionnaire_english.pdf [file questionnaire_english.pdf]

## Questionnaire

|                                                                                                                     | Never | Sometimes | Always |
|---------------------------------------------------------------------------------------------------------------------|-------|-----------|--------|
| Q1: Did I feel attention, commitment, and empathy from my teachers during the time they worked online?              |       |           |        |
| Q2: Did I feel too much workload in the activities in each of my subjects?                                          |       |           |        |
| Q3: Did the activities sent in your subjects overwhelmed, tired, or frustrated you emotionally or physically?       |       |           |        |
| Q4: Did you feel positive during your online learning? For examples, safe, satisfied, happy, relaxed and/or pleased |       |           |        |
| Q5: Did you concentrate taking online classes?                                                                      |       |           |        |
| Q6: Did I feel stressed because of my time distribution when taking online classes?                                 |       |           |        |
| Q7: Did I feel that I was unfairly asked to continue or adapt my academic duties in the presence of the pandemic?   |       |           |        |
| Q8: Did you consider that your school performance during online classes accomplished what you were hoping for?      |       |           |        |
| Q9: Did you feel that COVID-19 psychologically affected your school performance?                                    |       |           |        |

|                                                                                  | Joy | Stress | Uncertainty |
|----------------------------------------------------------------------------------|-----|--------|-------------|
| LQ: What would you feel if you were informed that classes would be online again? |     |        |             |
