# Supplementary material for: Using machine learning to analyze mental health in distance education during the COVID-19 pandemic: an opinion study from university students in Mexico
Source: PeerJ Comput Sci. 2024 Aug 8;10:e2241. doi: 10.7717/peerj-cs.2241 (PMC11323079; doi:10.7717/peerj-cs.2241)
Supplement: Supplemental Information 2 [file peerj-cs-10-2241-s002.xlsx]

## Sheet: Sheet1
Q1	Q2	Q3	Q4	Q5	Q6	Q7	Q8	Q9	LQ
3	2	2	2	2	1	3	1	1	3
2	3	2	1	1	3	1	1	3	2
2	3	2	1	1	3	1	1	3	2
3	3	1	3	3	1	1	3	3	2
2	2	3	2	1	3	1	1	3	2
3	2	1	2	2	2	1	1	3	2
2	2	3	1	1	2	3	1	3	2
3	2	1	3	3	3	1	3	1	1
2	2	2	2	2	3	3	3	1	2
3	3	2	2	2	3	1	1	3	2
3	2	2	2	1	2	3	1	3	2
2	2	2	2	3	2	1	3	1	3
3	2	1	2	2	2	1	1	3	2
2	2	2	1	2	2	1	1	3	2
3	2	2	2	2	2	1	1	3	2
3	1	1	3	3	1	1	3	1	1
3	2	2	2	2	2	3	1	3	2
3	2	2	3	2	2	1	1	3	2
2	2	2	1	1	3	3	1	2	2
3	2	2	3	3	2	3	3	3	3
3	2	2	2	2	2	1	3	1	3
3	2	2	2	2	2	1	1	3	3
2	2	1	2	2	1	1	1	1	2
3	2	1	2	2	2	1	1	2	2
2	2	3	2	2	3	1	1	3	2
3	1	1	3	2	2	1	1	3	3
3	3	3	3	2	3	1	3	1	2
2	2	2	3	2	2	1	1	3	3
2	2	3	2	1	2	3	1	3	2
2	2	2	2	2	2	1	3	3	2
3	2	2	3	2	2	1	3	3	3
3	2	2	2	2	3	1	3	3	2
2	2	3	1	1	2	3	1	3	2
2	2	3	2	2	2	3	3	2	1
2	3	2	2	1	1	1	1	3	2
2	2	1	2	2	1	1	1	1	3
2	3	3	1	1	3	3	1	3	2
2	3	3	1	1	3	3	1	3	2
2	2	2	1	2	2	3	1	2	2
3	2	2	3	3	2	1	3	2	2
2	2	2	2	2	1	1	1	3	3
2	2	2	2	2	1	1	1	3	3
2	2	2	2	2	1	1	1	3	3
3	2	2	2	2	1	1	1	1	3
2	3	3	2	2	3	1	1	3	2
3	2	2	3	3	2	1	3	1	2
2	3	3	2	3	2	1	1	3	3
2	1	2	2	2	1	1	1	3	2
2	3	3	1	2	2	1	1	3	2
2	2	3	1	2	2	3	1	2	3
2	2	1	2	2	3	1	1	3	3
2	2	2	2	2	2	1	3	3	3
3	2	2	2	2	2	1	3	2	3
2	2	2	2	2	2	1	3	3	3
3	2	2	2	2	2	1	3	3	2
2	3	2	2	3	3	3	1	3	2
3	3	3	2	3	3	3	1	3	2
2	3	3	2	2	3	3	1	3	3
2	3	3	2	2	2	3	1	3	2
3	2	1	2	2	2	3	3	1	2
3	1	2	3	2	2	1	1	3	2
2	2	2	2	2	3	3	3	3	2
3	2	1	2	2	2	1	1	3	2
2	2	2	1	2	2	1	1	3	2
3	2	2	3	3	1	1	1	1	3
3	3	2	2	2	2	1	1	3	2
3	2	2	3	3	1	1	3	1	3
2	2	2	2	3	3	1	1	3	2
2	2	2	2	3	1	1	3	2	3
3	2	1	3	2	2	1	3	1	2
3	1	1	3	2	1	1	3	3	3
2	3	3	2	1	3	1	1	3	3
2	2	3	2	2	3	3	3	1	2
3	2	2	2	2	2	1	1	3	2
2	2	2	2	2	3	1	1	3	2
2	3	2	1	2	2	3	1	3	2
2	3	2	1	1	2	1	1	1	2
2	3	3	2	2	3	1	1	3	2
2	3	3	2	2	3	1	1	3	2
2	3	3	2	2	3	1	1	3	2
2	3	2	2	2	3	3	1	3	2
3	2	2	1	1	1	1	1	2	3
3	2	1	2	2	1	1	1	2	3
3	2	2	3	3	2	1	3	1	2
3	2	2	3	2	2	1	3	1	3
3	2	2	2	2	2	1	1	3	3
2	3	2	2	2	3	3	1	3	2
3	2	1	3	3	2	1	3	1	3
2	2	2	2	2	3	1	3	3	3
3	2	2	2	2	2	1	1	3	2
3	2	2	2	2	2	3	1	3	2
3	3	2	3	3	2	1	3	1	1
2	1	1	2	2	2	1	1	2	2
3	2	1	3	3	1	1	3	3	3
3	3	3	2	1	3	1	1	3	2
3	2	2	2	3	2	1	3	3	2
2	2	1	3	2	1	1	3	2	3
2	2	3	1	2	2	1	1	3	2
3	2	2	2	2	1	1	1	3	3
2	2	2	1	1	2	1	1	2	2
2	2	2	1	1	2	1	1	2	2
3	2	2	3	3	2	1	3	3	3
3	2	2	2	2	2	1	1	3	3
2	2	2	2	3	3	3	3	1	2
2	2	2	3	2	1	1	1	3	2
3	2	2	2	2	2	1	3	1	3
2	2	2	2	3	1	1	1	2	2
2	1	1	2	2	1	1	3	2	3
2	1	1	2	2	1	1	3	2	3
3	2	2	3	3	1	1	3	1	1
2	2	2	2	2	2	1	1	3	2
2	2	2	1	2	2	1	1	3	2
2	1	2	2	2	2	1	1	3	2
2	2	2	2	2	1	1	3	2	2
2	3	2	1	1	2	3	1	3	3
2	3	2	1	1	1	3	1	3	2
2	3	3	2	3	2	1	1	3	3
3	2	2	3	3	2	1	1	3	2
3	2	2	2	2	2	1	1	3	2
3	2	2	2	2	3	1	3	2	1
2	3	2	2	2	3	1	1	3	2
2	2	2	2	1	2	1	1	1	2
2	3	2	2	2	3	1	3	3	2
2	2	2	1	2	2	1	1	3	2
3	2	2	2	3	2	1	3	3	2
2	3	3	2	2	3	3	1	2	2
2	3	2	2	2	3	3	1	2	3
2	3	2	1	2	2	1	1	1	2
3	2	2	2	2	3	1	1	3	2
3	2	3	1	2	2	1	1	3	2
2	2	2	2	2	2	1	1	3	2
2	2	3	1	2	2	1	1	3	2
2	2	2	2	2	3	1	1	1	3
2	2	2	1	2	2	1	1	3	2
2	2	2	2	1	2	1	1	1	2
3	2	2	2	2	2	1	1	3	2
2	2	2	1	3	3	1	1	3	2
3	2	2	2	2	2	1	1	3	2
2	3	3	1	2	3	3	1	3	2
3	2	2	2	2	3	3	3	1	3
2	2	2	2	3	2	1	1	3	2
3	3	2	2	2	3	1	3	1	2
3	2	1	3	2	2	1	1	3	3
2	3	3	2	2	2	3	1	1	2
2	2	2	2	1	1	1	3	3	2
3	2	2	2	2	3	1	1	1	2
2	2	2	2	2	3	1	1	3	2
2	3	2	2	1	2	3	1	2	2
3	2	1	2	3	2	1	3	3	3
3	2	2	3	2	2	1	1	1	3
3	2	1	2	2	2	1	1	3	3
2	3	2	2	2	2	1	1	3	2
3	2	2	2	3	3	1	1	3	2
3	2	2	3	2	2	3	3	3	3
2	2	2	2	2	1	1	1	3	2
2	2	2	2	1	3	1	1	3	2
2	3	2	2	2	3	1	3	3	3
3	1	1	2	2	2	3	1	1	3
3	1	1	3	3	1	1	3	1	1
2	3	2	2	2	3	1	1	1	2
2	3	2	2	1	2	1	1	1	3
3	2	2	2	3	1	1	3	3	2
2	3	3	2	2	2	3	1	3	2
3	2	2	2	2	2	1	1	3	2
2	2	2	2	2	2	3	1	3	2
2	2	2	1	1	2	3	3	3	2
3	2	2	2	3	2	1	3	2	3
3	2	2	3	2	2	1	1	3	3
2	2	2	2	2	2	1	1	2	2
1	3	3	1	2	3	1	1	3	2
3	2	1	2	3	2	1	1	1	3
3	2	3	2	2	2	3	1	3	2
3	2	2	2	3	2	1	1	3	2
2	2	3	2	2	3	1	1	3	2
3	2	2	2	2	2	1	1	2	3
2	3	3	2	3	2	1	1	3	3
3	2	1	2	3	2	1	3	2	3
2	3	3	1	2	2	1	1	1	2
2	2	1	2	3	2	1	1	1	2
2	3	2	1	1	3	3	1	1	3
3	2	1	3	3	2	1	3	3	2
3	2	2	2	2	2	1	3	3	1
2	3	3	2	2	3	3	1	3	2
3	2	1	3	2	1	3	1	1	3
2	2	2	1	2	2	1	1	2	3
3	2	2	2	2	2	1	1	3	2
3	3	2	1	2	1	1	3	3	2
1	1	2	3	3	1	1	3	1	1
3	2	2	2	3	2	1	1	3	2
2	2	1	2	2	1	1	1	3	3
2	3	3	1	2	2	3	1	3	2
3	2	2	3	3	1	1	3	1	1
2	3	3	2	2	3	3	1	3	2
3	2	2	2	2	2	1	1	3	2
3	2	1	3	2	2	1	3	3	1
2	2	2	2	2	1	1	1	3	2
2	2	3	2	1	3	3	1	3	2
2	2	2	2	2	2	1	1	1	2
3	3	2	2	2	2	1	1	3	2
2	2	3	1	2	3	1	1	3	2
2	3	3	2	2	2	1	1	3	2
3	2	2	3	3	2	1	3	3	2
2	2	2	2	2	1	1	1	1	3
2	2	2	2	2	1	1	1	1	3
3	3	2	1	2	1	1	3	3	2
2	1	2	1	2	3	1	1	3	2
3	2	1	2	2	2	3	1	3	3
3	2	2	2	2	2	1	3	1	2
2	2	2	3	2	2	1	1	3	1
3	2	2	2	3	2	1	3	1	2
3	2	2	2	2	2	3	1	1	2
3	2	1	2	3	1	1	3	2	1
1	3	3	1	1	2	1	1	3	3
3	2	2	2	2	2	3	1	3	3
2	3	3	1	2	3	3	1	3	2
2	3	3	2	3	3	3	1	3	2
2	2	1	2	3	1	1	3	1	3
3	2	2	2	3	2	3	1	3	2
3	2	2	1	2	1	1	1	3	2
2	3	3	1	1	3	3	1	3	2
3	2	2	3	2	2	1	1	1	3
3	2	1	3	2	2	1	1	1	3
2	1	1	2	1	2	1	1	1	2
3	2	2	3	3	3	1	1	3	3
3	2	2	2	2	1	1	1	3	2
3	2	2	2	2	2	1	3	3	2
2	2	2	3	2	2	1	1	3	2
2	2	3	1	2	2	3	1	3	2
3	2	2	2	3	2	3	1	1	3
3	3	2	2	2	3	1	3	3	2
2	3	2	2	3	1	1	3	1	3
3	2	1	2	2	2	1	1	3	2
3	2	1	2	2	2	1	1	3	2
3	2	1	3	2	3	1	3	3	2
3	2	2	3	3	1	1	3	1	3
3	2	2	2	3	2	1	3	1	3
3	2	1	3	3	1	1	3	1	3
3	2	2	2	2	2	1	3	2	1
2	3	3	1	1	2	1	1	2	2
2	2	2	2	2	3	1	1	2	2
3	2	3	2	2	3	1	3	1	2
2	3	3	1	1	3	3	1	3	2
2	2	2	2	1	2	1	1	3	2
2	2	2	1	1	2	1	1	2	2
2	2	3	1	1	2	1	1	2	2
3	2	2	2	2	2	3	1	3	3
3	2	2	2	2	2	3	1	3	3
2	2	3	2	2	2	3	1	3	2
2	2	3	2	2	2	3	1	3	2
2	3	3	2	3	1	1	3	1	3
3	2	2	3	3	1	1	1	3	2
3	1	2	2	2	1	1	1	1	3
2	2	2	3	3	3	1	3	3	2
3	1	2	2	2	2	1	1	1	2
2	3	3	2	2	3	3	1	3	2
2	2	3	2	2	3	1	1	3	2
3	2	2	2	3	2	1	3	2	3
3	2	2	2	2	2	1	3	3	2
2	2	2	2	1	2	1	1	3	2
3	1	2	3	3	3	1	3	2	2
2	2	2	3	1	2	1	3	3	2
2	3	2	2	3	2	1	3	1	2
2	3	2	2	3	2	1	3	1	2
2	2	3	1	2	2	3	1	3	2
3	2	2	2	2	2	1	3	3	3
2	2	2	2	2	2	3	1	2	2
2	2	1	2	3	2	1	3	3	2
3	2	2	2	2	2	1	1	1	2
2	3	2	2	1	2	1	1	3	1
3	2	2	2	2	2	1	3	1	2
3	2	2	2	2	2	1	3	1	2
3	2	1	2	3	2	1	1	3	3
3	2	1	2	3	2	1	1	3	3
3	2	2	3	3	2	1	3	1	1
3	2	2	2	2	3	3	1	1	2
2	2	2	3	1	3	1	3	1	3
3	2	2	2	2	2	1	1	3	3
2	3	1	2	1	1	1	1	1	2
2	3	3	2	2	2	3	1	3	2
2	3	3	2	2	2	3	1	3	2
3	2	2	3	3	2	1	1	1	2
3	2	2	2	2	2	1	1	2	2
3	2	1	2	2	2	1	1	2	3
3	2	2	2	3	2	1	3	1	2
3	1	2	2	2	2	3	3	3	3
3	2	2	3	3	1	1	3	1	3
3	2	2	3	2	2	1	3	1	3
2	2	2	1	2	3	1	1	3	2
2	2	2	2	2	2	1	1	3	2
3	2	2	2	2	1	1	3	3	3
2	2	2	2	2	1	1	3	1	2
2	3	3	1	2	2	1	1	3	2
3	2	2	2	3	2	1	3	1	2
3	2	1	2	2	2	1	3	2	2
2	3	3	2	2	3	3	1	3	3
3	2	1	2	2	2	1	1	1	3
3	1	1	2	3	2	1	3	1	2
3	1	2	3	3	1	1	3	1	1
3	1	2	3	3	1	1	3	1	1
3	2	2	3	3	1	1	3	1	3
2	2	1	3	3	1	1	3	1	1
3	2	2	1	2	3	1	1	3	2
3	2	2	2	2	3	1	1	3	2
3	2	2	2	2	3	1	1	3	2
3	2	2	1	2	3	1	3	1	2
3	2	2	2	2	2	1	1	3	2
3	2	2	2	1	2	3	1	3	3
2	2	2	2	2	3	3	3	3	2
2	2	3	2	2	3	3	1	2	2
2	2	3	1	2	3	1	3	3	2
2	2	1	2	2	2	3	1	3	3
2	2	3	1	2	2	1	1	3	2
2	2	2	2	2	3	1	3	3	3
2	2	2	2	3	2	1	1	1	3
2	2	1	2	2	2	3	1	1	2
3	2	2	2	1	2	1	1	3	2
3	3	2	2	3	2	3	3	3	3
2	2	3	2	1	3	1	3	3	2
2	3	3	1	1	3	3	1	3	3
2	1	1	2	2	1	1	3	2	2
2	3	3	1	1	3	1	1	2	2
2	2	2	2	3	3	3	1	3	2
2	2	2	1	2	2	1	1	1	2
2	2	3	2	2	2	1	1	3	3
2	2	1	2	2	1	1	3	1	3
3	2	3	2	3	2	1	1	3	2
2	2	3	1	1	3	1	1	3	2
2	3	2	1	2	3	1	1	3	2
2	3	2	1	2	3	1	1	3	2
2	3	2	1	2	3	1	1	3	2
2	2	2	1	2	2	1	1	2	3
2	2	2	2	2	1	1	1	1	2
3	2	1	3	1	2	1	1	3	3
3	3	3	2	2	2	1	3	3	3
3	2	1	2	2	1	1	3	3	3
3	2	2	2	2	3	3	1	3	2
3	2	2	3	3	2	1	3	1	1
1	3	3	1	2	3	3	1	3	2
3	3	2	2	2	2	3	3	3	2
3	2	1	2	2	2	1	3	3	2
3	2	2	3	2	2	3	1	3	2
2	3	3	2	2	2	3	1	3	2
3	2	2	1	2	1	1	1	3	2
3	1	1	1	3	1	1	3	1	1
2	2	2	2	1	2	1	1	1	2
2	2	2	2	2	2	3	1	3	2
3	2	2	1	1	3	1	1	3	2
3	1	2	1	2	1	1	1	3	2
2	3	3	3	2	2	1	3	1	3
2	2	2	2	3	3	3	1	3	2
3	2	2	2	1	3	1	1	3	2
2	3	3	1	2	3	3	1	3	2
3	2	2	2	2	3	1	3	1	2
2	2	2	2	2	2	1	1	3	2
2	3	3	2	2	2	3	1	3	2
2	3	3	2	2	3	3	1	3	2
3	2	2	3	3	1	1	3	1	3
3	2	2	2	2	2	1	3	3	2
3	2	2	3	2	2	1	1	3	1
2	2	2	2	2	2	3	1	3	2
2	3	3	1	2	3	1	1	3	2
2	2	2	2	3	1	1	3	1	2
2	2	2	2	2	1	1	3	1	2
3	1	3	2	3	1	1	3	1	3
3	1	1	3	3	1	1	3	1	1
3	2	2	2	2	2	1	1	1	2
2	2	2	2	2	2	1	1	3	2
2	2	2	2	2	2	1	1	3	2
2	2	2	2	2	2	3	1	1	2
3	2	2	2	2	2	1	3	3	2
2	3	2	2	3	2	1	1	3	2
2	3	3	2	2	3	1	1	3	2
3	2	2	2	2	2	1	3	1	2
2	2	2	2	2	2	3	1	3	2
3	2	2	2	2	2	1	1	3	2
2	3	2	1	2	2	3	1	2	2
3	2	2	2	2	3	1	1	1	2
3	2	2	2	2	2	3	1	3	2
2	3	2	2	2	2	1	1	3	2
2	2	3	2	3	2	1	3	3	3
2	2	2	1	1	1	1	1	2	2
