# Supplementary material for: Using machine learning to analyze mental health in distance education during the COVID-19 pandemic: an opinion study from university students in Mexico
Source: PeerJ Comput Sci. 2024 Aug 8;10:e2241. doi: 10.7717/peerj-cs.2241 (PMC11323079; doi:10.7717/peerj-cs.2241)
Supplement: Supplemental Information 3 [file peerj-cs-10-2241-s003.xlsx]

## Sheet: virtual questionnaire
Q1	Q2	Q3	Q4	Q5	Q6	Q7	Q8	Q9	LQ
Always	Sometimes	Sometimes	Sometimes	Sometimes	Never	Always	Never	Never	Uncertainty
Sometimes	Always	Sometimes	Never	Never	Always	Never	Never	Always	Stress
Sometimes	Always	Sometimes	Never	Never	Always	Never	Never	Always	Stress
Always	Always	Never	Always	Always	Never	Never	Always	Always	Stress
Sometimes	Sometimes	Always	Sometimes	Never	Always	Never	Never	Always	Stress
Always	Sometimes	Never	Sometimes	Sometimes	Sometimes	Never	Never	Always	Stress
Sometimes	Sometimes	Always	Never	Never	Sometimes	Always	Never	Always	Stress
Always	Sometimes	Never	Always	Always	Always	Never	Always	Never	Joy
Sometimes	Sometimes	Sometimes	Sometimes	Sometimes	Always	Always	Always	Never	Stress
Always	Always	Sometimes	Sometimes	Sometimes	Always	Never	Never	Always	Stress
Always	Sometimes	Sometimes	Sometimes	Never	Sometimes	Always	Never	Always	Stress
Sometimes	Sometimes	Sometimes	Sometimes	Always	Sometimes	Never	Always	Never	Uncertainty
Always	Sometimes	Never	Sometimes	Sometimes	Sometimes	Never	Never	Always	Stress
Sometimes	Sometimes	Sometimes	Never	Sometimes	Sometimes	Never	Never	Always	Stress
Always	Sometimes	Sometimes	Sometimes	Sometimes	Sometimes	Never	Never	Always	Stress
Always	Never	Never	Always	Always	Never	Never	Always	Never	Joy
Always	Sometimes	Sometimes	Sometimes	Sometimes	Sometimes	Always	Never	Always	Stress
Always	Sometimes	Sometimes	Always	Sometimes	Sometimes	Never	Never	Always	Stress
Sometimes	Sometimes	Sometimes	Never	Never	Always	Always	Never	Sometimes	Stress
Always	Sometimes	Sometimes	Always	Always	Sometimes	Always	Always	Always	Uncertainty
Always	Sometimes	Sometimes	Sometimes	Sometimes	Sometimes	Never	Always	Never	Uncertainty
Always	Sometimes	Sometimes	Sometimes	Sometimes	Sometimes	Never	Never	Always	Uncertainty
Sometimes	Sometimes	Never	Sometimes	Sometimes	Never	Never	Never	Never	Stress
Always	Sometimes	Never	Sometimes	Sometimes	Sometimes	Never	Never	Sometimes	Stress
Sometimes	Sometimes	Always	Sometimes	Sometimes	Always	Never	Never	Always	Stress
Always	Never	Never	Always	Sometimes	Sometimes	Never	Never	Always	Uncertainty
Always	Always	Always	Always	Sometimes	Always	Never	Always	Never	Stress
Sometimes	Sometimes	Sometimes	Always	Sometimes	Sometimes	Never	Never	Always	Uncertainty
Sometimes	Sometimes	Always	Sometimes	Never	Sometimes	Always	Never	Always	Stress
Sometimes	Sometimes	Sometimes	Sometimes	Sometimes	Sometimes	Never	Always	Always	Stress
Always	Sometimes	Sometimes	Always	Sometimes	Sometimes	Never	Always	Always	Uncertainty
Always	Sometimes	Sometimes	Sometimes	Sometimes	Always	Never	Always	Always	Stress
Sometimes	Sometimes	Always	Never	Never	Sometimes	Always	Never	Always	Stress
Sometimes	Sometimes	Always	Sometimes	Sometimes	Sometimes	Always	Always	Sometimes	Joy
Sometimes	Always	Sometimes	Sometimes	Never	Never	Never	Never	Always	Stress
Sometimes	Sometimes	Never	Sometimes	Sometimes	Never	Never	Never	Never	Uncertainty
Sometimes	Always	Always	Never	Never	Always	Always	Never	Always	Stress
Sometimes	Always	Always	Never	Never	Always	Always	Never	Always	Stress
Sometimes	Sometimes	Sometimes	Never	Sometimes	Sometimes	Always	Never	Sometimes	Stress
Always	Sometimes	Sometimes	Always	Always	Sometimes	Never	Always	Sometimes	Stress
Sometimes	Sometimes	Sometimes	Sometimes	Sometimes	Never	Never	Never	Always	Uncertainty
Sometimes	Sometimes	Sometimes	Sometimes	Sometimes	Never	Never	Never	Always	Uncertainty
Sometimes	Sometimes	Sometimes	Sometimes	Sometimes	Never	Never	Never	Always	Uncertainty
Always	Sometimes	Sometimes	Sometimes	Sometimes	Never	Never	Never	Never	Uncertainty
Sometimes	Always	Always	Sometimes	Sometimes	Always	Never	Never	Always	Stress
Always	Sometimes	Sometimes	Always	Always	Sometimes	Never	Always	Never	Stress
Sometimes	Always	Always	Sometimes	Always	Sometimes	Never	Never	Always	Uncertainty
Sometimes	Never	Sometimes	Sometimes	Sometimes	Never	Never	Never	Always	Stress
Sometimes	Always	Always	Never	Sometimes	Sometimes	Never	Never	Always	Stress
Sometimes	Sometimes	Always	Never	Sometimes	Sometimes	Always	Never	Sometimes	Uncertainty
Sometimes	Sometimes	Never	Sometimes	Sometimes	Always	Never	Never	Always	Uncertainty
Sometimes	Sometimes	Sometimes	Sometimes	Sometimes	Sometimes	Never	Always	Always	Uncertainty
Always	Sometimes	Sometimes	Sometimes	Sometimes	Sometimes	Never	Always	Sometimes	Uncertainty
Sometimes	Sometimes	Sometimes	Sometimes	Sometimes	Sometimes	Never	Always	Always	Uncertainty
Always	Sometimes	Sometimes	Sometimes	Sometimes	Sometimes	Never	Always	Always	Stress
Sometimes	Always	Sometimes	Sometimes	Always	Always	Always	Never	Always	Stress
Always	Always	Always	Sometimes	Always	Always	Always	Never	Always	Stress
Sometimes	Always	Always	Sometimes	Sometimes	Always	Always	Never	Always	Uncertainty
Sometimes	Always	Always	Sometimes	Sometimes	Sometimes	Always	Never	Always	Stress
Always	Sometimes	Never	Sometimes	Sometimes	Sometimes	Always	Always	Never	Stress
Always	Never	Sometimes	Always	Sometimes	Sometimes	Never	Never	Always	Stress
Sometimes	Sometimes	Sometimes	Sometimes	Sometimes	Always	Always	Always	Always	Stress
Always	Sometimes	Never	Sometimes	Sometimes	Sometimes	Never	Never	Always	Stress
Sometimes	Sometimes	Sometimes	Never	Sometimes	Sometimes	Never	Never	Always	Stress
Always	Sometimes	Sometimes	Always	Always	Never	Never	Never	Never	Uncertainty
Always	Always	Sometimes	Sometimes	Sometimes	Sometimes	Never	Never	Always	Stress
Always	Sometimes	Sometimes	Always	Always	Never	Never	Always	Never	Uncertainty
Sometimes	Sometimes	Sometimes	Sometimes	Always	Always	Never	Never	Always	Stress
Sometimes	Sometimes	Sometimes	Sometimes	Always	Never	Never	Always	Sometimes	Uncertainty
Always	Sometimes	Never	Always	Sometimes	Sometimes	Never	Always	Never	Stress
Always	Never	Never	Always	Sometimes	Never	Never	Always	Always	Uncertainty
Sometimes	Always	Always	Sometimes	Never	Always	Never	Never	Always	Uncertainty
Sometimes	Sometimes	Always	Sometimes	Sometimes	Always	Always	Always	Never	Stress
Always	Sometimes	Sometimes	Sometimes	Sometimes	Sometimes	Never	Never	Always	Stress
Sometimes	Sometimes	Sometimes	Sometimes	Sometimes	Always	Never	Never	Always	Stress
Sometimes	Always	Sometimes	Never	Sometimes	Sometimes	Always	Never	Always	Stress
Sometimes	Always	Sometimes	Never	Never	Sometimes	Never	Never	Never	Stress
Sometimes	Always	Always	Sometimes	Sometimes	Always	Never	Never	Always	Stress
Sometimes	Always	Always	Sometimes	Sometimes	Always	Never	Never	Always	Stress
Sometimes	Always	Always	Sometimes	Sometimes	Always	Never	Never	Always	Stress
Sometimes	Always	Sometimes	Sometimes	Sometimes	Always	Always	Never	Always	Stress
Always	Sometimes	Sometimes	Never	Never	Never	Never	Never	Sometimes	Uncertainty
Always	Sometimes	Never	Sometimes	Sometimes	Never	Never	Never	Sometimes	Uncertainty
Always	Sometimes	Sometimes	Always	Always	Sometimes	Never	Always	Never	Stress
Always	Sometimes	Sometimes	Always	Sometimes	Sometimes	Never	Always	Never	Uncertainty
Always	Sometimes	Sometimes	Sometimes	Sometimes	Sometimes	Never	Never	Always	Uncertainty
Sometimes	Always	Sometimes	Sometimes	Sometimes	Always	Always	Never	Always	Stress
Always	Sometimes	Never	Always	Always	Sometimes	Never	Always	Never	Uncertainty
Sometimes	Sometimes	Sometimes	Sometimes	Sometimes	Always	Never	Always	Always	Uncertainty
Always	Sometimes	Sometimes	Sometimes	Sometimes	Sometimes	Never	Never	Always	Stress
Always	Sometimes	Sometimes	Sometimes	Sometimes	Sometimes	Always	Never	Always	Stress
Always	Always	Sometimes	Always	Always	Sometimes	Never	Always	Never	Joy
Sometimes	Never	Never	Sometimes	Sometimes	Sometimes	Never	Never	Sometimes	Stress
Always	Sometimes	Never	Always	Always	Never	Never	Always	Always	Uncertainty
Always	Always	Always	Sometimes	Never	Always	Never	Never	Always	Stress
Always	Sometimes	Sometimes	Sometimes	Always	Sometimes	Never	Always	Always	Stress
Sometimes	Sometimes	Never	Always	Sometimes	Never	Never	Always	Sometimes	Uncertainty
Sometimes	Sometimes	Always	Never	Sometimes	Sometimes	Never	Never	Always	Stress
Always	Sometimes	Sometimes	Sometimes	Sometimes	Never	Never	Never	Always	Uncertainty
Sometimes	Sometimes	Sometimes	Never	Never	Sometimes	Never	Never	Sometimes	Stress
Sometimes	Sometimes	Sometimes	Never	Never	Sometimes	Never	Never	Sometimes	Stress
Always	Sometimes	Sometimes	Always	Always	Sometimes	Never	Always	Always	Uncertainty
Always	Sometimes	Sometimes	Sometimes	Sometimes	Sometimes	Never	Never	Always	Uncertainty
Sometimes	Sometimes	Sometimes	Sometimes	Always	Always	Always	Always	Never	Stress
Sometimes	Sometimes	Sometimes	Always	Sometimes	Never	Never	Never	Always	Stress
Always	Sometimes	Sometimes	Sometimes	Sometimes	Sometimes	Never	Always	Never	Uncertainty
Sometimes	Sometimes	Sometimes	Sometimes	Always	Never	Never	Never	Sometimes	Stress
Sometimes	Never	Never	Sometimes	Sometimes	Never	Never	Always	Sometimes	Uncertainty
Sometimes	Never	Never	Sometimes	Sometimes	Never	Never	Always	Sometimes	Uncertainty
Always	Sometimes	Sometimes	Always	Always	Never	Never	Always	Never	Joy
Sometimes	Sometimes	Sometimes	Sometimes	Sometimes	Sometimes	Never	Never	Always	Stress
Sometimes	Sometimes	Sometimes	Never	Sometimes	Sometimes	Never	Never	Always	Stress
Sometimes	Never	Sometimes	Sometimes	Sometimes	Sometimes	Never	Never	Always	Stress
Sometimes	Sometimes	Sometimes	Sometimes	Sometimes	Never	Never	Always	Sometimes	Stress
Sometimes	Always	Sometimes	Never	Never	Sometimes	Always	Never	Always	Uncertainty
Sometimes	Always	Sometimes	Never	Never	Never	Always	Never	Always	Stress
Sometimes	Always	Always	Sometimes	Always	Sometimes	Never	Never	Always	Uncertainty
Always	Sometimes	Sometimes	Always	Always	Sometimes	Never	Never	Always	Stress
Always	Sometimes	Sometimes	Sometimes	Sometimes	Sometimes	Never	Never	Always	Stress
Always	Sometimes	Sometimes	Sometimes	Sometimes	Always	Never	Always	Sometimes	Joy
Sometimes	Always	Sometimes	Sometimes	Sometimes	Always	Never	Never	Always	Stress
Sometimes	Sometimes	Sometimes	Sometimes	Never	Sometimes	Never	Never	Never	Stress
Sometimes	Always	Sometimes	Sometimes	Sometimes	Always	Never	Always	Always	Stress
Sometimes	Sometimes	Sometimes	Never	Sometimes	Sometimes	Never	Never	Always	Stress
Always	Sometimes	Sometimes	Sometimes	Always	Sometimes	Never	Always	Always	Stress
Sometimes	Always	Always	Sometimes	Sometimes	Always	Always	Never	Sometimes	Stress
Sometimes	Always	Sometimes	Sometimes	Sometimes	Always	Always	Never	Sometimes	Uncertainty
Sometimes	Always	Sometimes	Never	Sometimes	Sometimes	Never	Never	Never	Stress
Always	Sometimes	Sometimes	Sometimes	Sometimes	Always	Never	Never	Always	Stress
Always	Sometimes	Always	Never	Sometimes	Sometimes	Never	Never	Always	Stress
Sometimes	Sometimes	Sometimes	Sometimes	Sometimes	Sometimes	Never	Never	Always	Stress
Sometimes	Sometimes	Always	Never	Sometimes	Sometimes	Never	Never	Always	Stress
Sometimes	Sometimes	Sometimes	Sometimes	Sometimes	Always	Never	Never	Never	Uncertainty
Sometimes	Sometimes	Sometimes	Never	Sometimes	Sometimes	Never	Never	Always	Stress
Sometimes	Sometimes	Sometimes	Sometimes	Never	Sometimes	Never	Never	Never	Stress
Always	Sometimes	Sometimes	Sometimes	Sometimes	Sometimes	Never	Never	Always	Stress
Sometimes	Sometimes	Sometimes	Never	Always	Always	Never	Never	Always	Stress
Always	Sometimes	Sometimes	Sometimes	Sometimes	Sometimes	Never	Never	Always	Stress
Sometimes	Always	Always	Never	Sometimes	Always	Always	Never	Always	Stress
Always	Sometimes	Sometimes	Sometimes	Sometimes	Always	Always	Always	Never	Uncertainty
Sometimes	Sometimes	Sometimes	Sometimes	Always	Sometimes	Never	Never	Always	Stress
Always	Always	Sometimes	Sometimes	Sometimes	Always	Never	Always	Never	Stress
Always	Sometimes	Never	Always	Sometimes	Sometimes	Never	Never	Always	Uncertainty
Sometimes	Always	Always	Sometimes	Sometimes	Sometimes	Always	Never	Never	Stress
Sometimes	Sometimes	Sometimes	Sometimes	Never	Never	Never	Always	Always	Stress
Always	Sometimes	Sometimes	Sometimes	Sometimes	Always	Never	Never	Never	Stress
Sometimes	Sometimes	Sometimes	Sometimes	Sometimes	Always	Never	Never	Always	Stress
Sometimes	Always	Sometimes	Sometimes	Never	Sometimes	Always	Never	Sometimes	Stress
Always	Sometimes	Never	Sometimes	Always	Sometimes	Never	Always	Always	Uncertainty
Always	Sometimes	Sometimes	Always	Sometimes	Sometimes	Never	Never	Never	Uncertainty
Always	Sometimes	Never	Sometimes	Sometimes	Sometimes	Never	Never	Always	Uncertainty
Sometimes	Always	Sometimes	Sometimes	Sometimes	Sometimes	Never	Never	Always	Stress
Always	Sometimes	Sometimes	Sometimes	Always	Always	Never	Never	Always	Stress
Always	Sometimes	Sometimes	Always	Sometimes	Sometimes	Always	Always	Always	Uncertainty
Sometimes	Sometimes	Sometimes	Sometimes	Sometimes	Never	Never	Never	Always	Stress
Sometimes	Sometimes	Sometimes	Sometimes	Never	Always	Never	Never	Always	Stress
Sometimes	Always	Sometimes	Sometimes	Sometimes	Always	Never	Always	Always	Uncertainty
Always	Never	Never	Sometimes	Sometimes	Sometimes	Always	Never	Never	Uncertainty
Always	Never	Never	Always	Always	Never	Never	Always	Never	Joy
Sometimes	Always	Sometimes	Sometimes	Sometimes	Always	Never	Never	Never	Stress
Sometimes	Always	Sometimes	Sometimes	Never	Sometimes	Never	Never	Never	Uncertainty
Always	Sometimes	Sometimes	Sometimes	Always	Never	Never	Always	Always	Stress
Sometimes	Always	Always	Sometimes	Sometimes	Sometimes	Always	Never	Always	Stress
Always	Sometimes	Sometimes	Sometimes	Sometimes	Sometimes	Never	Never	Always	Stress
Sometimes	Sometimes	Sometimes	Sometimes	Sometimes	Sometimes	Always	Never	Always	Stress
Sometimes	Sometimes	Sometimes	Never	Never	Sometimes	Always	Always	Always	Stress
Always	Sometimes	Sometimes	Sometimes	Always	Sometimes	Never	Always	Sometimes	Uncertainty
Always	Sometimes	Sometimes	Always	Sometimes	Sometimes	Never	Never	Always	Uncertainty
Sometimes	Sometimes	Sometimes	Sometimes	Sometimes	Sometimes	Never	Never	Sometimes	Stress
Never	Always	Always	Never	Sometimes	Always	Never	Never	Always	Stress
Always	Sometimes	Never	Sometimes	Always	Sometimes	Never	Never	Never	Uncertainty
Always	Sometimes	Always	Sometimes	Sometimes	Sometimes	Always	Never	Always	Stress
Always	Sometimes	Sometimes	Sometimes	Always	Sometimes	Never	Never	Always	Stress
Sometimes	Sometimes	Always	Sometimes	Sometimes	Always	Never	Never	Always	Stress
Always	Sometimes	Sometimes	Sometimes	Sometimes	Sometimes	Never	Never	Sometimes	Uncertainty
Sometimes	Always	Always	Sometimes	Always	Sometimes	Never	Never	Always	Uncertainty
Always	Sometimes	Never	Sometimes	Always	Sometimes	Never	Always	Sometimes	Uncertainty
Sometimes	Always	Always	Never	Sometimes	Sometimes	Never	Never	Never	Stress
Sometimes	Sometimes	Never	Sometimes	Always	Sometimes	Never	Never	Never	Stress
Sometimes	Always	Sometimes	Never	Never	Always	Always	Never	Never	Uncertainty
Always	Sometimes	Never	Always	Always	Sometimes	Never	Always	Always	Stress
Always	Sometimes	Sometimes	Sometimes	Sometimes	Sometimes	Never	Always	Always	Joy
Sometimes	Always	Always	Sometimes	Sometimes	Always	Always	Never	Always	Stress
Always	Sometimes	Never	Always	Sometimes	Never	Always	Never	Never	Uncertainty
Sometimes	Sometimes	Sometimes	Never	Sometimes	Sometimes	Never	Never	Sometimes	Uncertainty
Always	Sometimes	Sometimes	Sometimes	Sometimes	Sometimes	Never	Never	Always	Stress
Always	Always	Sometimes	Never	Sometimes	Never	Never	Always	Always	Stress
Never	Never	Sometimes	Always	Always	Never	Never	Always	Never	Joy
Always	Sometimes	Sometimes	Sometimes	Always	Sometimes	Never	Never	Always	Stress
Sometimes	Sometimes	Never	Sometimes	Sometimes	Never	Never	Never	Always	Uncertainty
Sometimes	Always	Always	Never	Sometimes	Sometimes	Always	Never	Always	Stress
Always	Sometimes	Sometimes	Always	Always	Never	Never	Always	Never	Joy
Sometimes	Always	Always	Sometimes	Sometimes	Always	Always	Never	Always	Stress
Always	Sometimes	Sometimes	Sometimes	Sometimes	Sometimes	Never	Never	Always	Stress
Always	Sometimes	Never	Always	Sometimes	Sometimes	Never	Always	Always	Joy
Sometimes	Sometimes	Sometimes	Sometimes	Sometimes	Never	Never	Never	Always	Stress
Sometimes	Sometimes	Always	Sometimes	Never	Always	Always	Never	Always	Stress
Sometimes	Sometimes	Sometimes	Sometimes	Sometimes	Sometimes	Never	Never	Never	Stress
Always	Always	Sometimes	Sometimes	Sometimes	Sometimes	Never	Never	Always	Stress
Sometimes	Sometimes	Always	Never	Sometimes	Always	Never	Never	Always	Stress
Sometimes	Always	Always	Sometimes	Sometimes	Sometimes	Never	Never	Always	Stress
Always	Sometimes	Sometimes	Always	Always	Sometimes	Never	Always	Always	Stress
Sometimes	Sometimes	Sometimes	Sometimes	Sometimes	Never	Never	Never	Never	Uncertainty
Sometimes	Sometimes	Sometimes	Sometimes	Sometimes	Never	Never	Never	Never	Uncertainty
Always	Always	Sometimes	Never	Sometimes	Never	Never	Always	Always	Stress
Sometimes	Never	Sometimes	Never	Sometimes	Always	Never	Never	Always	Stress
Always	Sometimes	Never	Sometimes	Sometimes	Sometimes	Always	Never	Always	Uncertainty
Always	Sometimes	Sometimes	Sometimes	Sometimes	Sometimes	Never	Always	Never	Stress
Sometimes	Sometimes	Sometimes	Always	Sometimes	Sometimes	Never	Never	Always	Joy
Always	Sometimes	Sometimes	Sometimes	Always	Sometimes	Never	Always	Never	Stress
Always	Sometimes	Sometimes	Sometimes	Sometimes	Sometimes	Always	Never	Never	Stress
Always	Sometimes	Never	Sometimes	Always	Never	Never	Always	Sometimes	Joy
Never	Always	Always	Never	Never	Sometimes	Never	Never	Always	Uncertainty
Always	Sometimes	Sometimes	Sometimes	Sometimes	Sometimes	Always	Never	Always	Uncertainty
Sometimes	Always	Always	Never	Sometimes	Always	Always	Never	Always	Stress
Sometimes	Always	Always	Sometimes	Always	Always	Always	Never	Always	Stress
Sometimes	Sometimes	Never	Sometimes	Always	Never	Never	Always	Never	Uncertainty
Always	Sometimes	Sometimes	Sometimes	Always	Sometimes	Always	Never	Always	Stress
Always	Sometimes	Sometimes	Never	Sometimes	Never	Never	Never	Always	Stress
Sometimes	Always	Always	Never	Never	Always	Always	Never	Always	Stress
Always	Sometimes	Sometimes	Always	Sometimes	Sometimes	Never	Never	Never	Uncertainty
Always	Sometimes	Never	Always	Sometimes	Sometimes	Never	Never	Never	Uncertainty
Sometimes	Never	Never	Sometimes	Never	Sometimes	Never	Never	Never	Stress
Always	Sometimes	Sometimes	Always	Always	Always	Never	Never	Always	Uncertainty
Always	Sometimes	Sometimes	Sometimes	Sometimes	Never	Never	Never	Always	Stress
Always	Sometimes	Sometimes	Sometimes	Sometimes	Sometimes	Never	Always	Always	Stress
Sometimes	Sometimes	Sometimes	Always	Sometimes	Sometimes	Never	Never	Always	Stress
Sometimes	Sometimes	Always	Never	Sometimes	Sometimes	Always	Never	Always	Stress
Always	Sometimes	Sometimes	Sometimes	Always	Sometimes	Always	Never	Never	Uncertainty
Always	Always	Sometimes	Sometimes	Sometimes	Always	Never	Always	Always	Stress
Sometimes	Always	Sometimes	Sometimes	Always	Never	Never	Always	Never	Uncertainty
Always	Sometimes	Never	Sometimes	Sometimes	Sometimes	Never	Never	Always	Stress
Always	Sometimes	Never	Sometimes	Sometimes	Sometimes	Never	Never	Always	Stress
Always	Sometimes	Never	Always	Sometimes	Always	Never	Always	Always	Stress
Always	Sometimes	Sometimes	Always	Always	Never	Never	Always	Never	Uncertainty
Always	Sometimes	Sometimes	Sometimes	Always	Sometimes	Never	Always	Never	Uncertainty
Always	Sometimes	Never	Always	Always	Never	Never	Always	Never	Uncertainty
Always	Sometimes	Sometimes	Sometimes	Sometimes	Sometimes	Never	Always	Sometimes	Joy
Sometimes	Always	Always	Never	Never	Sometimes	Never	Never	Sometimes	Stress
Sometimes	Sometimes	Sometimes	Sometimes	Sometimes	Always	Never	Never	Sometimes	Stress
Always	Sometimes	Always	Sometimes	Sometimes	Always	Never	Always	Never	Stress
Sometimes	Always	Always	Never	Never	Always	Always	Never	Always	Stress
Sometimes	Sometimes	Sometimes	Sometimes	Never	Sometimes	Never	Never	Always	Stress
Sometimes	Sometimes	Sometimes	Never	Never	Sometimes	Never	Never	Sometimes	Stress
Sometimes	Sometimes	Always	Never	Never	Sometimes	Never	Never	Sometimes	Stress
Always	Sometimes	Sometimes	Sometimes	Sometimes	Sometimes	Always	Never	Always	Uncertainty
Always	Sometimes	Sometimes	Sometimes	Sometimes	Sometimes	Always	Never	Always	Uncertainty
Sometimes	Sometimes	Always	Sometimes	Sometimes	Sometimes	Always	Never	Always	Stress
Sometimes	Sometimes	Always	Sometimes	Sometimes	Sometimes	Always	Never	Always	Stress
Sometimes	Always	Always	Sometimes	Always	Never	Never	Always	Never	Uncertainty
Always	Sometimes	Sometimes	Always	Always	Never	Never	Never	Always	Stress
Always	Never	Sometimes	Sometimes	Sometimes	Never	Never	Never	Never	Uncertainty
Sometimes	Sometimes	Sometimes	Always	Always	Always	Never	Always	Always	Stress
Always	Never	Sometimes	Sometimes	Sometimes	Sometimes	Never	Never	Never	Stress
Sometimes	Always	Always	Sometimes	Sometimes	Always	Always	Never	Always	Stress
Sometimes	Sometimes	Always	Sometimes	Sometimes	Always	Never	Never	Always	Stress
Always	Sometimes	Sometimes	Sometimes	Always	Sometimes	Never	Always	Sometimes	Uncertainty
Always	Sometimes	Sometimes	Sometimes	Sometimes	Sometimes	Never	Always	Always	Stress
Sometimes	Sometimes	Sometimes	Sometimes	Never	Sometimes	Never	Never	Always	Stress
Always	Never	Sometimes	Always	Always	Always	Never	Always	Sometimes	Stress
Sometimes	Sometimes	Sometimes	Always	Never	Sometimes	Never	Always	Always	Stress
Sometimes	Always	Sometimes	Sometimes	Always	Sometimes	Never	Always	Never	Stress
Sometimes	Always	Sometimes	Sometimes	Always	Sometimes	Never	Always	Never	Stress
Sometimes	Sometimes	Always	Never	Sometimes	Sometimes	Always	Never	Always	Stress
Always	Sometimes	Sometimes	Sometimes	Sometimes	Sometimes	Never	Always	Always	Uncertainty
Sometimes	Sometimes	Sometimes	Sometimes	Sometimes	Sometimes	Always	Never	Sometimes	Stress
Sometimes	Sometimes	Never	Sometimes	Always	Sometimes	Never	Always	Always	Stress
Always	Sometimes	Sometimes	Sometimes	Sometimes	Sometimes	Never	Never	Never	Stress
Sometimes	Always	Sometimes	Sometimes	Never	Sometimes	Never	Never	Always	Joy
Always	Sometimes	Sometimes	Sometimes	Sometimes	Sometimes	Never	Always	Never	Stress
Always	Sometimes	Sometimes	Sometimes	Sometimes	Sometimes	Never	Always	Never	Stress
Always	Sometimes	Never	Sometimes	Always	Sometimes	Never	Never	Always	Uncertainty
Always	Sometimes	Never	Sometimes	Always	Sometimes	Never	Never	Always	Uncertainty
Always	Sometimes	Sometimes	Always	Always	Sometimes	Never	Always	Never	Joy
Always	Sometimes	Sometimes	Sometimes	Sometimes	Always	Always	Never	Never	Stress
Sometimes	Sometimes	Sometimes	Always	Never	Always	Never	Always	Never	Uncertainty
Always	Sometimes	Sometimes	Sometimes	Sometimes	Sometimes	Never	Never	Always	Uncertainty
Sometimes	Always	Never	Sometimes	Never	Never	Never	Never	Never	Stress
Sometimes	Always	Always	Sometimes	Sometimes	Sometimes	Always	Never	Always	Stress
Sometimes	Always	Always	Sometimes	Sometimes	Sometimes	Always	Never	Always	Stress
Always	Sometimes	Sometimes	Always	Always	Sometimes	Never	Never	Never	Stress
Always	Sometimes	Sometimes	Sometimes	Sometimes	Sometimes	Never	Never	Sometimes	Stress
Always	Sometimes	Never	Sometimes	Sometimes	Sometimes	Never	Never	Sometimes	Uncertainty
Always	Sometimes	Sometimes	Sometimes	Always	Sometimes	Never	Always	Never	Stress
Always	Never	Sometimes	Sometimes	Sometimes	Sometimes	Always	Always	Always	Uncertainty
Always	Sometimes	Sometimes	Always	Always	Never	Never	Always	Never	Uncertainty
Always	Sometimes	Sometimes	Always	Sometimes	Sometimes	Never	Always	Never	Uncertainty
Sometimes	Sometimes	Sometimes	Never	Sometimes	Always	Never	Never	Always	Stress
Sometimes	Sometimes	Sometimes	Sometimes	Sometimes	Sometimes	Never	Never	Always	Stress
Always	Sometimes	Sometimes	Sometimes	Sometimes	Never	Never	Always	Always	Uncertainty
Sometimes	Sometimes	Sometimes	Sometimes	Sometimes	Never	Never	Always	Never	Stress
Sometimes	Always	Always	Never	Sometimes	Sometimes	Never	Never	Always	Stress
Always	Sometimes	Sometimes	Sometimes	Always	Sometimes	Never	Always	Never	Stress
Always	Sometimes	Never	Sometimes	Sometimes	Sometimes	Never	Always	Sometimes	Stress
Sometimes	Always	Always	Sometimes	Sometimes	Always	Always	Never	Always	Uncertainty
Always	Sometimes	Never	Sometimes	Sometimes	Sometimes	Never	Never	Never	Uncertainty
Always	Never	Never	Sometimes	Always	Sometimes	Never	Always	Never	Stress
Always	Never	Sometimes	Always	Always	Never	Never	Always	Never	Joy
Always	Never	Sometimes	Always	Always	Never	Never	Always	Never	Joy
Always	Sometimes	Sometimes	Always	Always	Never	Never	Always	Never	Uncertainty
Sometimes	Sometimes	Never	Always	Always	Never	Never	Always	Never	Joy
Always	Sometimes	Sometimes	Never	Sometimes	Always	Never	Never	Always	Stress
Always	Sometimes	Sometimes	Sometimes	Sometimes	Always	Never	Never	Always	Stress
Always	Sometimes	Sometimes	Sometimes	Sometimes	Always	Never	Never	Always	Stress
Always	Sometimes	Sometimes	Never	Sometimes	Always	Never	Always	Never	Stress
Always	Sometimes	Sometimes	Sometimes	Sometimes	Sometimes	Never	Never	Always	Stress
Always	Sometimes	Sometimes	Sometimes	Never	Sometimes	Always	Never	Always	Uncertainty
Sometimes	Sometimes	Sometimes	Sometimes	Sometimes	Always	Always	Always	Always	Stress
Sometimes	Sometimes	Always	Sometimes	Sometimes	Always	Always	Never	Sometimes	Stress
Sometimes	Sometimes	Always	Never	Sometimes	Always	Never	Always	Always	Stress
Sometimes	Sometimes	Never	Sometimes	Sometimes	Sometimes	Always	Never	Always	Uncertainty
Sometimes	Sometimes	Always	Never	Sometimes	Sometimes	Never	Never	Always	Stress
Sometimes	Sometimes	Sometimes	Sometimes	Sometimes	Always	Never	Always	Always	Uncertainty
Sometimes	Sometimes	Sometimes	Sometimes	Always	Sometimes	Never	Never	Never	Uncertainty
Sometimes	Sometimes	Never	Sometimes	Sometimes	Sometimes	Always	Never	Never	Stress
Always	Sometimes	Sometimes	Sometimes	Never	Sometimes	Never	Never	Always	Stress
Always	Always	Sometimes	Sometimes	Always	Sometimes	Always	Always	Always	Uncertainty
Sometimes	Sometimes	Always	Sometimes	Never	Always	Never	Always	Always	Stress
Sometimes	Always	Always	Never	Never	Always	Always	Never	Always	Uncertainty
Sometimes	Never	Never	Sometimes	Sometimes	Never	Never	Always	Sometimes	Stress
Sometimes	Always	Always	Never	Never	Always	Never	Never	Sometimes	Stress
Sometimes	Sometimes	Sometimes	Sometimes	Always	Always	Always	Never	Always	Stress
Sometimes	Sometimes	Sometimes	Never	Sometimes	Sometimes	Never	Never	Never	Stress
Sometimes	Sometimes	Always	Sometimes	Sometimes	Sometimes	Never	Never	Always	Uncertainty
Sometimes	Sometimes	Never	Sometimes	Sometimes	Never	Never	Always	Never	Uncertainty
Always	Sometimes	Always	Sometimes	Always	Sometimes	Never	Never	Always	Stress
Sometimes	Sometimes	Always	Never	Never	Always	Never	Never	Always	Stress
Sometimes	Always	Sometimes	Never	Sometimes	Always	Never	Never	Always	Stress
Sometimes	Always	Sometimes	Never	Sometimes	Always	Never	Never	Always	Stress
Sometimes	Always	Sometimes	Never	Sometimes	Always	Never	Never	Always	Stress
Sometimes	Sometimes	Sometimes	Never	Sometimes	Sometimes	Never	Never	Sometimes	Uncertainty
Sometimes	Sometimes	Sometimes	Sometimes	Sometimes	Never	Never	Never	Never	Stress
Always	Sometimes	Never	Always	Never	Sometimes	Never	Never	Always	Uncertainty
Always	Always	Always	Sometimes	Sometimes	Sometimes	Never	Always	Always	Uncertainty
Always	Sometimes	Never	Sometimes	Sometimes	Never	Never	Always	Always	Uncertainty
Always	Sometimes	Sometimes	Sometimes	Sometimes	Always	Always	Never	Always	Stress
Always	Sometimes	Sometimes	Always	Always	Sometimes	Never	Always	Never	Joy
Never	Always	Always	Never	Sometimes	Always	Always	Never	Always	Stress
Always	Always	Sometimes	Sometimes	Sometimes	Sometimes	Always	Always	Always	Stress
Always	Sometimes	Never	Sometimes	Sometimes	Sometimes	Never	Always	Always	Stress
Always	Sometimes	Sometimes	Always	Sometimes	Sometimes	Always	Never	Always	Stress
Sometimes	Always	Always	Sometimes	Sometimes	Sometimes	Always	Never	Always	Stress
Always	Sometimes	Sometimes	Never	Sometimes	Never	Never	Never	Always	Stress
Always	Never	Never	Never	Always	Never	Never	Always	Never	Joy
Sometimes	Sometimes	Sometimes	Sometimes	Never	Sometimes	Never	Never	Never	Stress
Sometimes	Sometimes	Sometimes	Sometimes	Sometimes	Sometimes	Always	Never	Always	Stress
Always	Sometimes	Sometimes	Never	Never	Always	Never	Never	Always	Stress
Always	Never	Sometimes	Never	Sometimes	Never	Never	Never	Always	Stress
Sometimes	Always	Always	Always	Sometimes	Sometimes	Never	Always	Never	Uncertainty
Sometimes	Sometimes	Sometimes	Sometimes	Always	Always	Always	Never	Always	Stress
Always	Sometimes	Sometimes	Sometimes	Never	Always	Never	Never	Always	Stress
Sometimes	Always	Always	Never	Sometimes	Always	Always	Never	Always	Stress
Always	Sometimes	Sometimes	Sometimes	Sometimes	Always	Never	Always	Never	Stress
Sometimes	Sometimes	Sometimes	Sometimes	Sometimes	Sometimes	Never	Never	Always	Stress
Sometimes	Always	Always	Sometimes	Sometimes	Sometimes	Always	Never	Always	Stress
Sometimes	Always	Always	Sometimes	Sometimes	Always	Always	Never	Always	Stress
Always	Sometimes	Sometimes	Always	Always	Never	Never	Always	Never	Uncertainty
Always	Sometimes	Sometimes	Sometimes	Sometimes	Sometimes	Never	Always	Always	Stress
Always	Sometimes	Sometimes	Always	Sometimes	Sometimes	Never	Never	Always	Joy
Sometimes	Sometimes	Sometimes	Sometimes	Sometimes	Sometimes	Always	Never	Always	Stress
Sometimes	Always	Always	Never	Sometimes	Always	Never	Never	Always	Stress
Sometimes	Sometimes	Sometimes	Sometimes	Always	Never	Never	Always	Never	Stress
Sometimes	Sometimes	Sometimes	Sometimes	Sometimes	Never	Never	Always	Never	Stress
Always	Never	Always	Sometimes	Always	Never	Never	Always	Never	Uncertainty
Always	Never	Never	Always	Always	Never	Never	Always	Never	Joy
Always	Sometimes	Sometimes	Sometimes	Sometimes	Sometimes	Never	Never	Never	Stress
Sometimes	Sometimes	Sometimes	Sometimes	Sometimes	Sometimes	Never	Never	Always	Stress
Sometimes	Sometimes	Sometimes	Sometimes	Sometimes	Sometimes	Never	Never	Always	Stress
Sometimes	Sometimes	Sometimes	Sometimes	Sometimes	Sometimes	Always	Never	Never	Stress
Always	Sometimes	Sometimes	Sometimes	Sometimes	Sometimes	Never	Always	Always	Stress
Sometimes	Always	Sometimes	Sometimes	Always	Sometimes	Never	Never	Always	Stress
Sometimes	Always	Always	Sometimes	Sometimes	Always	Never	Never	Always	Stress
Always	Sometimes	Sometimes	Sometimes	Sometimes	Sometimes	Never	Always	Never	Stress
Sometimes	Sometimes	Sometimes	Sometimes	Sometimes	Sometimes	Always	Never	Always	Stress
Always	Sometimes	Sometimes	Sometimes	Sometimes	Sometimes	Never	Never	Always	Stress
Sometimes	Always	Sometimes	Never	Sometimes	Sometimes	Always	Never	Sometimes	Stress
Always	Sometimes	Sometimes	Sometimes	Sometimes	Always	Never	Never	Never	Stress
Always	Sometimes	Sometimes	Sometimes	Sometimes	Sometimes	Always	Never	Always	Stress
Sometimes	Always	Sometimes	Sometimes	Sometimes	Sometimes	Never	Never	Always	Stress
Sometimes	Sometimes	Always	Sometimes	Always	Sometimes	Never	Always	Always	Uncertainty
Sometimes	Sometimes	Sometimes	Never	Never	Never	Never	Never	Sometimes	Stress
